# Supplementary material for: Phosphated cyclodextrins as water-soluble chiral NMR solvating agents for cationic compounds
Source: publisher site journal article supplement (doi:10.3762/bjoc.13.6), 2017-01-06
Supplement: Additional file 1 [file 1860-5397-13-6-S1.pdf]

**Supporting Information**  
**for**  
**Phosphated cyclodextrins as water-soluble chiral NMR solvating**  
**agents for cationic compounds**

Cira Mollings Puentes and Thomas J. Wenzel\*

Address: Department of Chemistry, Bates College, Lewiston, Maine 04240 USA

Email: Thomas Wenzel - [twenzel@bates.edu](mailto:twenzel@bates.edu)

\*Corresponding author

Complete  $^1\text{H}$  NMR spectra are provided for the samples in Figures 3 and 4.  
Additional regions of the spectra of Figure 5 are provided

**Figure S1**  $^1\text{H}$  NMR spectrum of (a) **3** (10 mM, enriched in (*R*)-enantiomer) in the presence of (b) P- $\alpha$ -CD-H (10 mM), (c) P- $\beta$ -CD-H (10 mM) and (d) P- $\gamma$ -CD-H (10 mM).

# SpinWorks 3: (S)-Dimethyl Phenethyl Amine Substrate

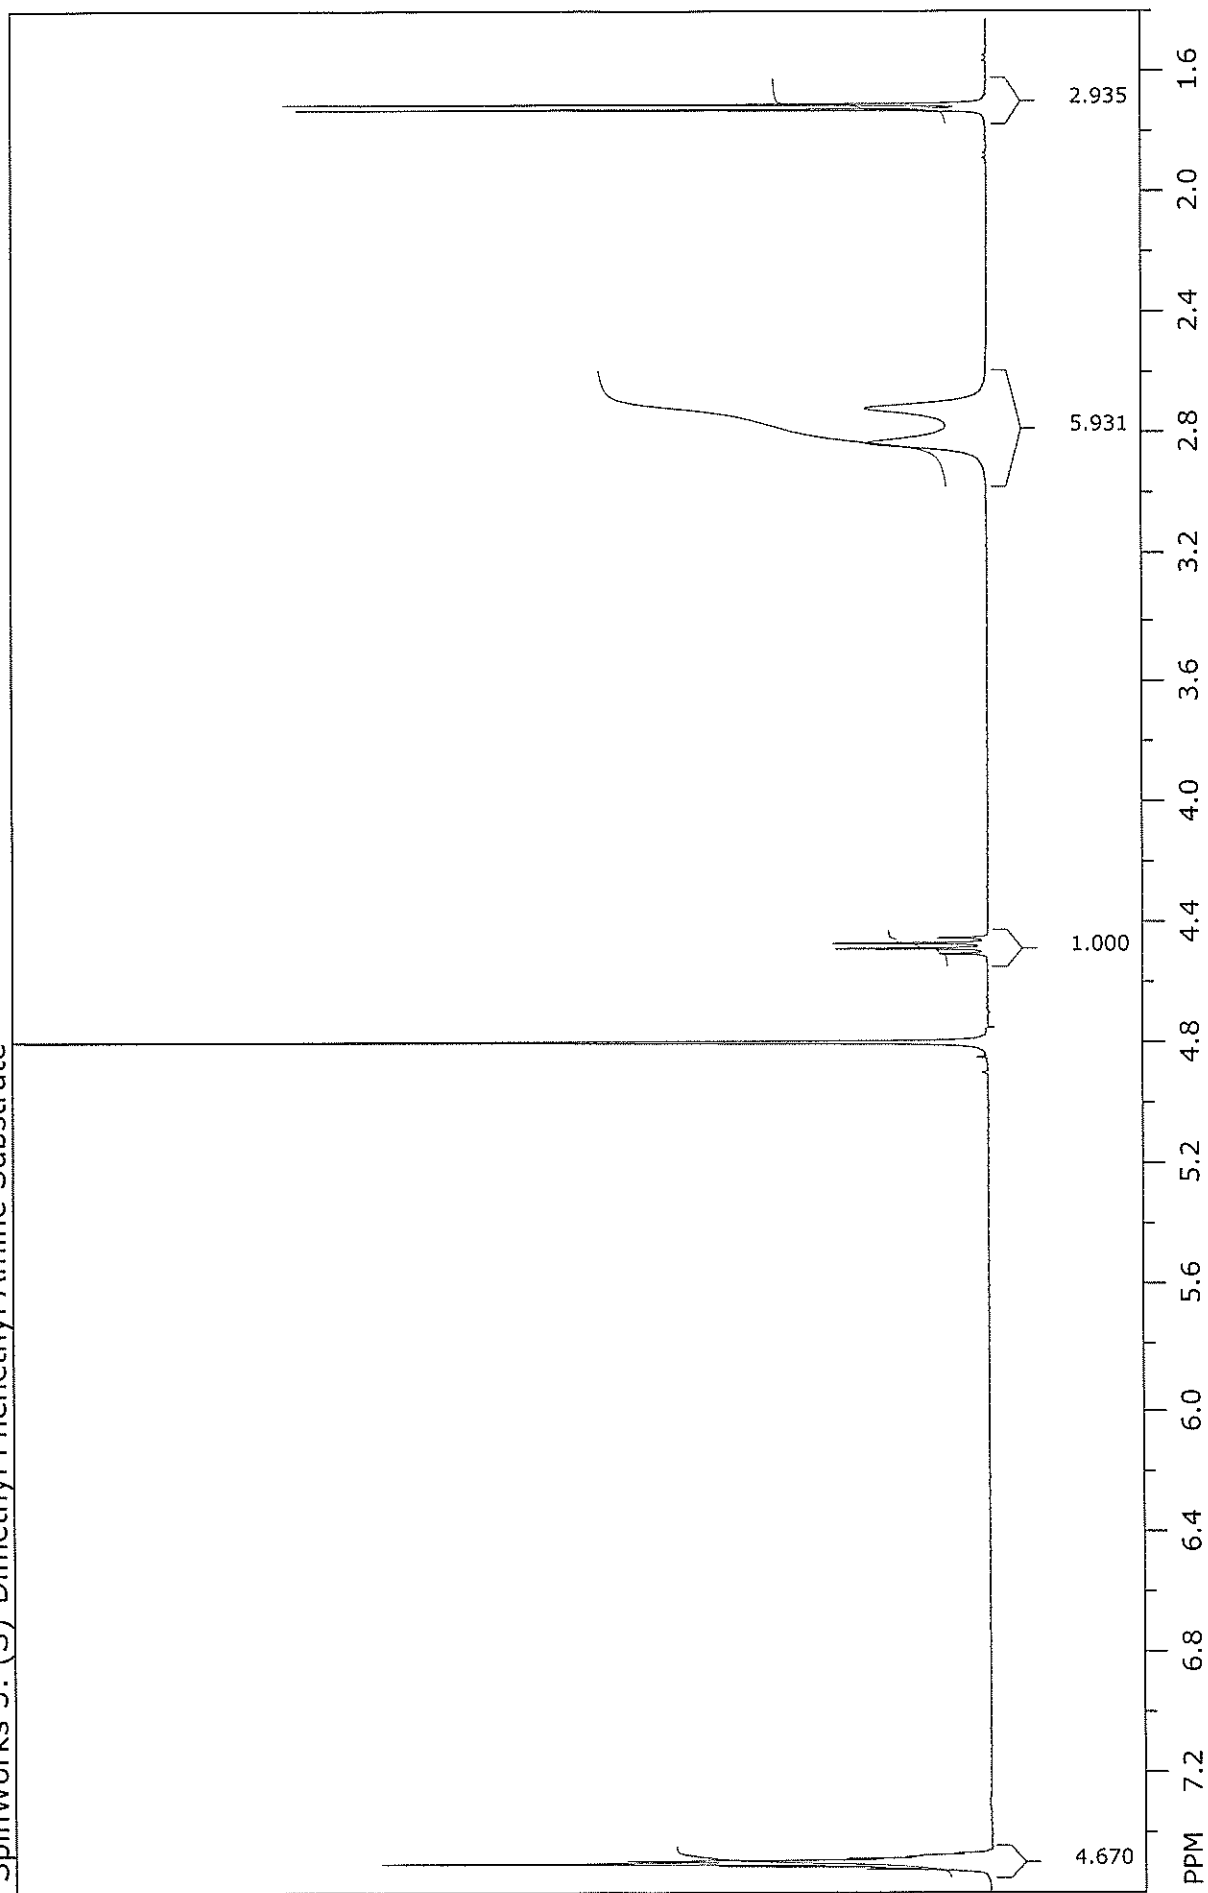

file: I:\bdaivano\nmr\BED\_7\1\fid expt: <zg30>  
 transmitter freq.: 400.132471 MHz  
 time domain size: 65536 points  
 width: 8278.15 Hz = 20.6885 ppm = 0.126314 Hz/pt  
 number of scans: 8  
 freq. of 0 ppm: 400.129960 MHz  
 processed size: 32768 complex points  
 LB: 0.000 GF: 0.0000  
 Hz/cm: 99.087 ppm/cm: 0.24764

(a)

SpinWorks 3: Phosphated (Alpha-cyclodextrin) HDS (10mM) w/ Dimethylphenethylamine10mM)

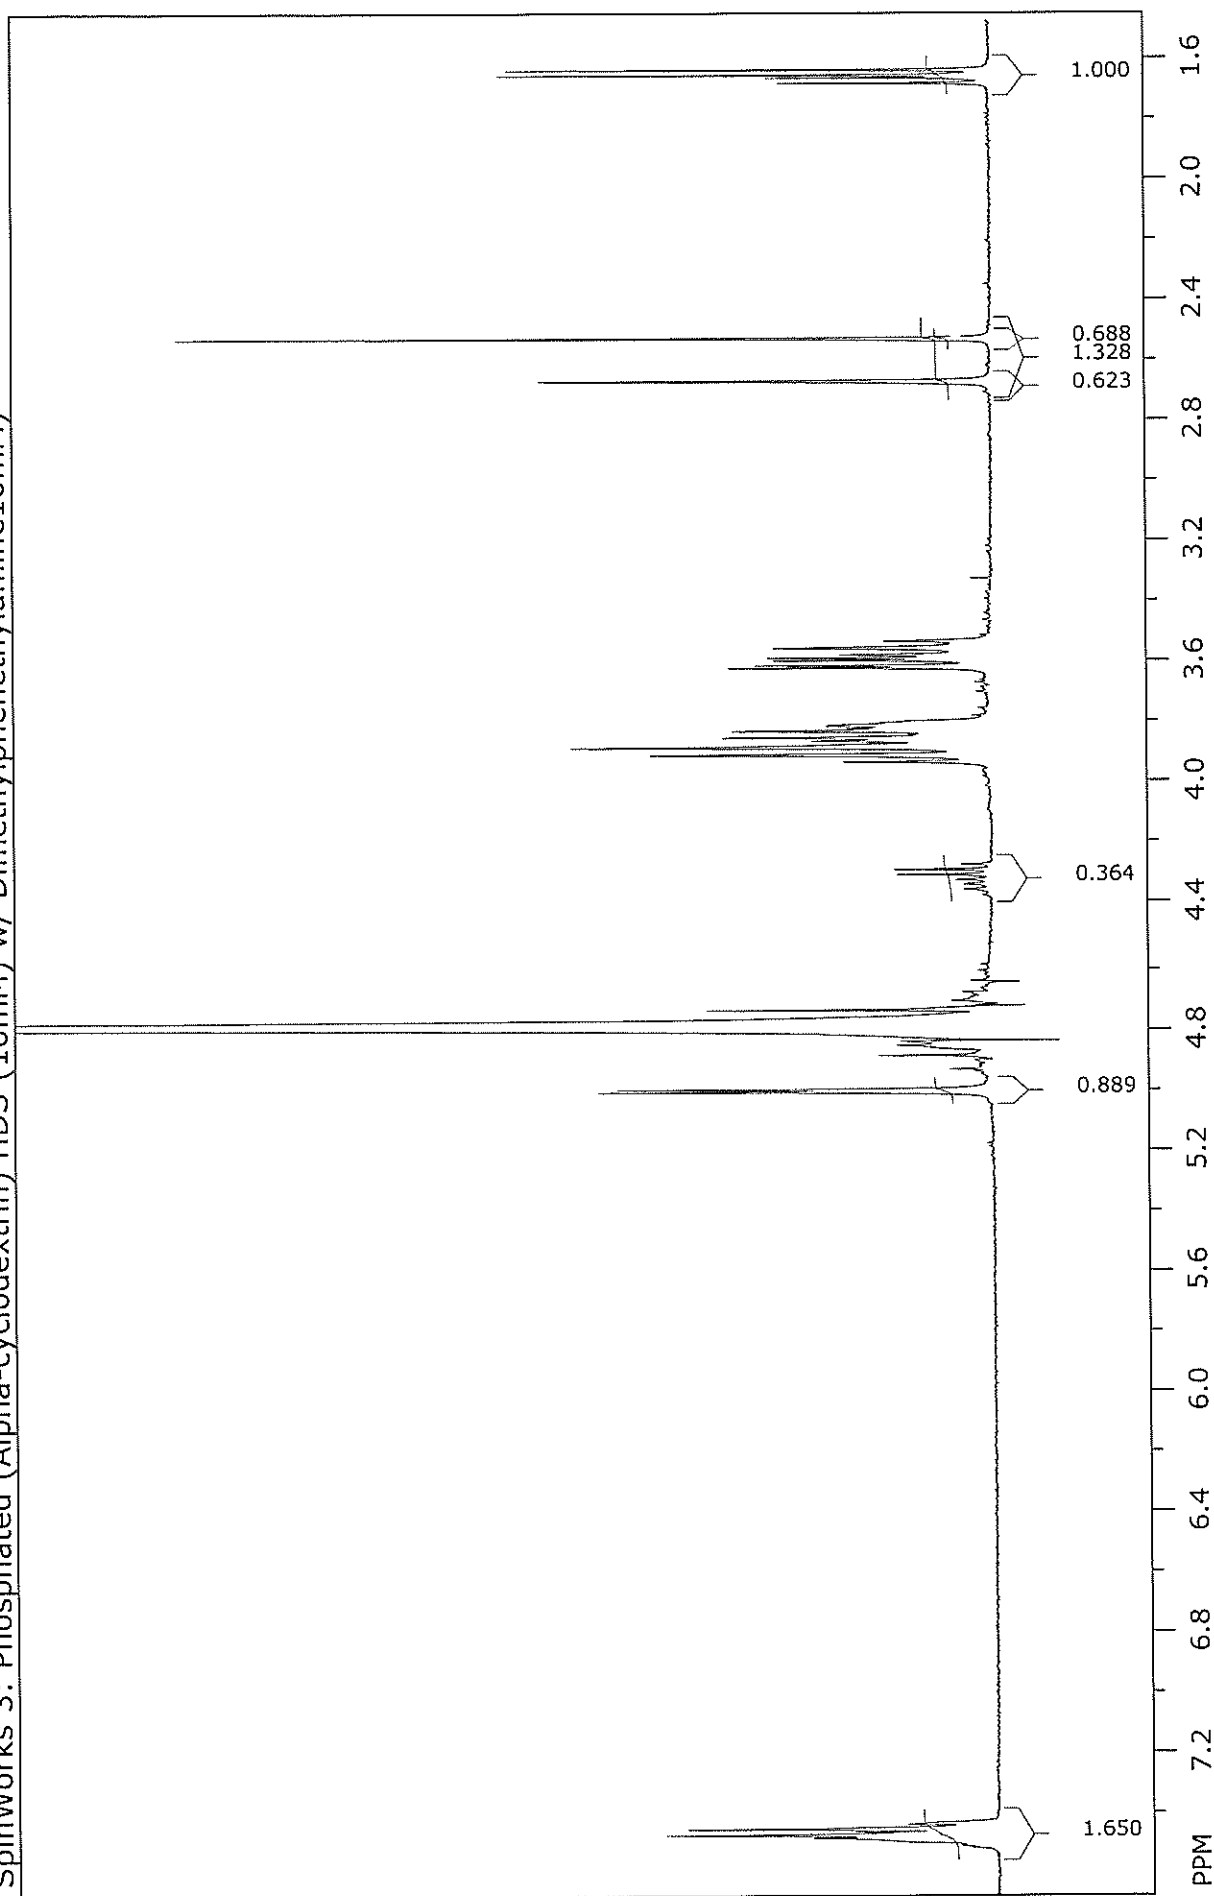

file: ...mollingspuentes\nmr\CMP\_390\10\fid expt: <zg30>  
 transmitter freq.: 400.132471 MHz  
 time domain size: 65536 points  
 width: 8278.15 Hz = 20.6885 ppm = 0.126314 Hz/pt  
 number of scans: 8  
 freq. of 0 ppm: 400.129960 MHz  
 processed size: 32768 complex points  
 LB: 0.000 GF: 0.0000  
 Hz/cm: 99.589 ppm/cm: 0.24889

(b)

SpinWorks 3: Phosphated (Beta-cyclodextrin) HDS (10mM) w/ Dimethylphenethylamine10mM)

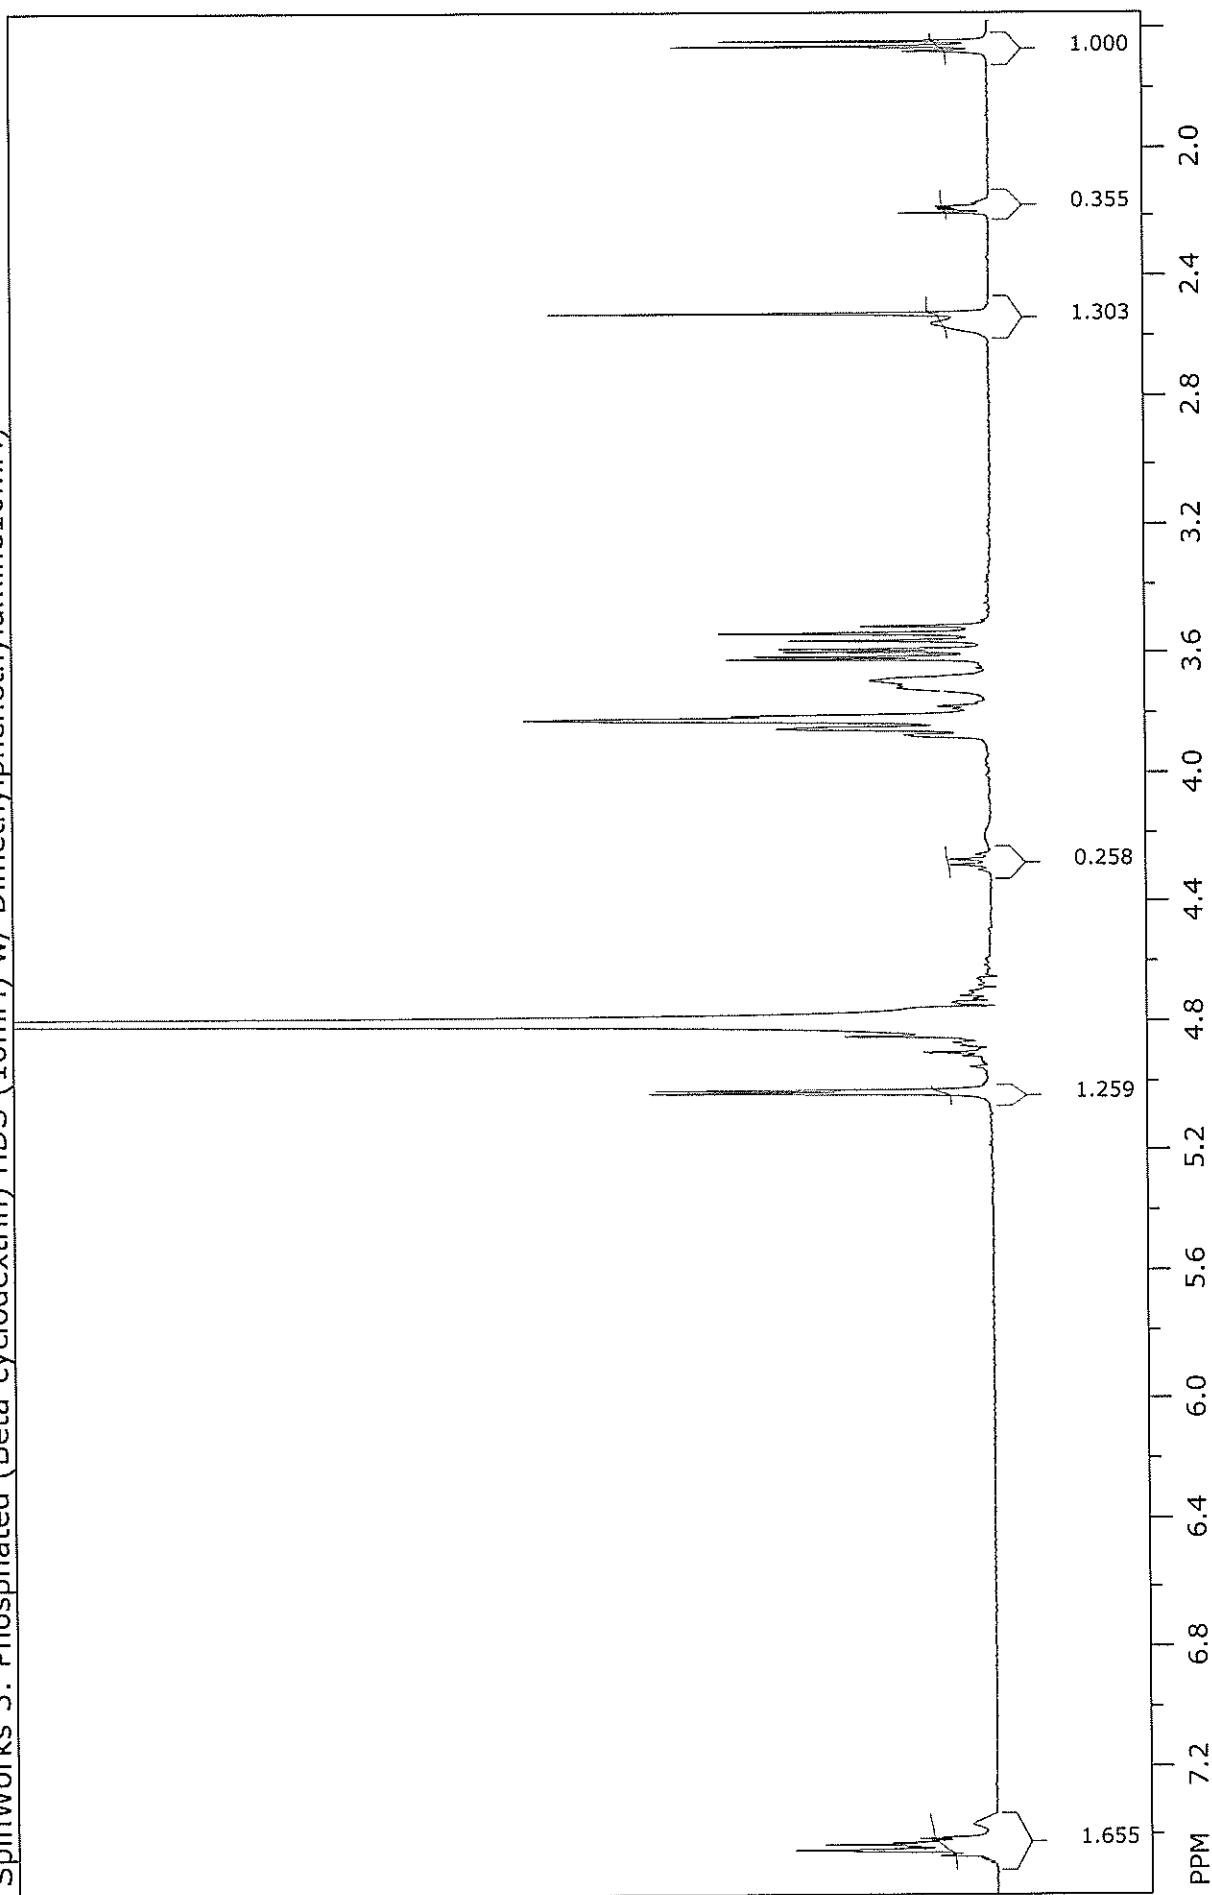

freq. of 0 ppm: 400.129960 MHz  
processed size: 32768 complex points  
LB: 0.000 GF: 0.0000  
Hz/cm: 96.765 ppm/cm: 0.24183

file: ...mollingspuentes\nmr\CMP\_392\10\fid exp: <zg30>  
transmitter freq.: 400.132471 MHz  
time domain size: 65536 points  
width: 8278.15 Hz = 20.6885 ppm = 0.126314 Hz/pt  
number of scans: 8

(c)

# SpinWorks 3: Phosphated (Gamma-cyclodextrin) HDS (10mM) w/ Dimethylphenethylamine10mM

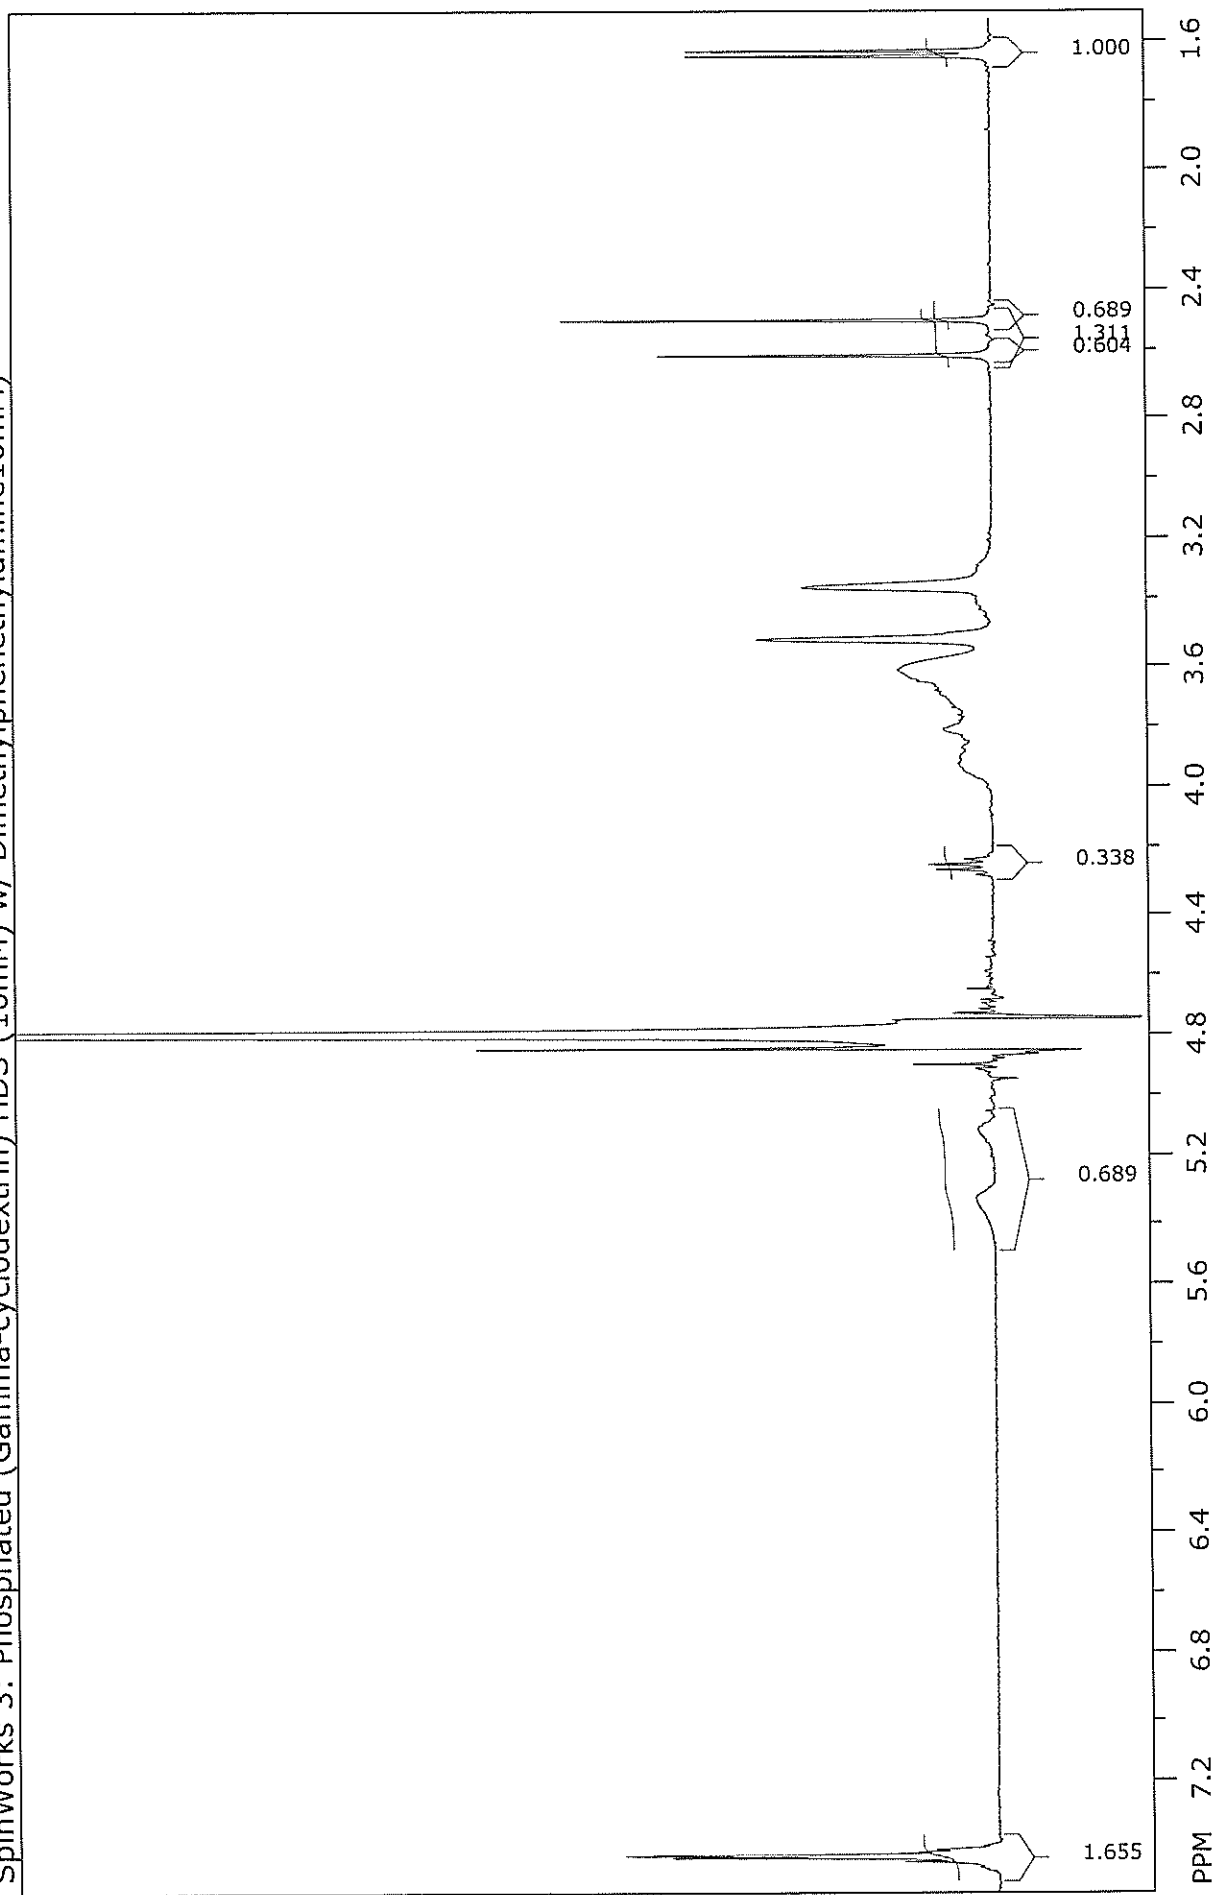

file: ...mollingspuentes\nmr\CMP\_394\10\fid exp: <zg30>  
 transmitter freq.: 400.132471 MHz  
 time domain size: 65536 points  
 width: 8278.15 Hz = 20.6885 ppm = 0.126314 Hz/pt  
 number of scans: 8

freq. of 0 ppm: 400.129960 MHz  
 processed size: 32768 complex points  
 LB: 0.000 GF: 0.0000  
 Hz/cm: 97.099 ppm/cm: 0.24267

(2)

**Figure S2.**  $^1\text{H}$  NMR spectrum of (a) **7** (10 mM, enriched in (1*S*2*R*)-enantiomer) with 20 mM of (b) P- $\alpha$ -CD-L, (c) P- $\alpha$ -CD-H, (d) P- $\beta$ -CD-L, (e) P- $\beta$ -CD-H, (f) P- $\gamma$ -CD-L and (g) P- $\gamma$ -CD-H.

CMP\_298 1 1 C: cmollings puentes

(1R,2S) Ephedrine hydrochloride

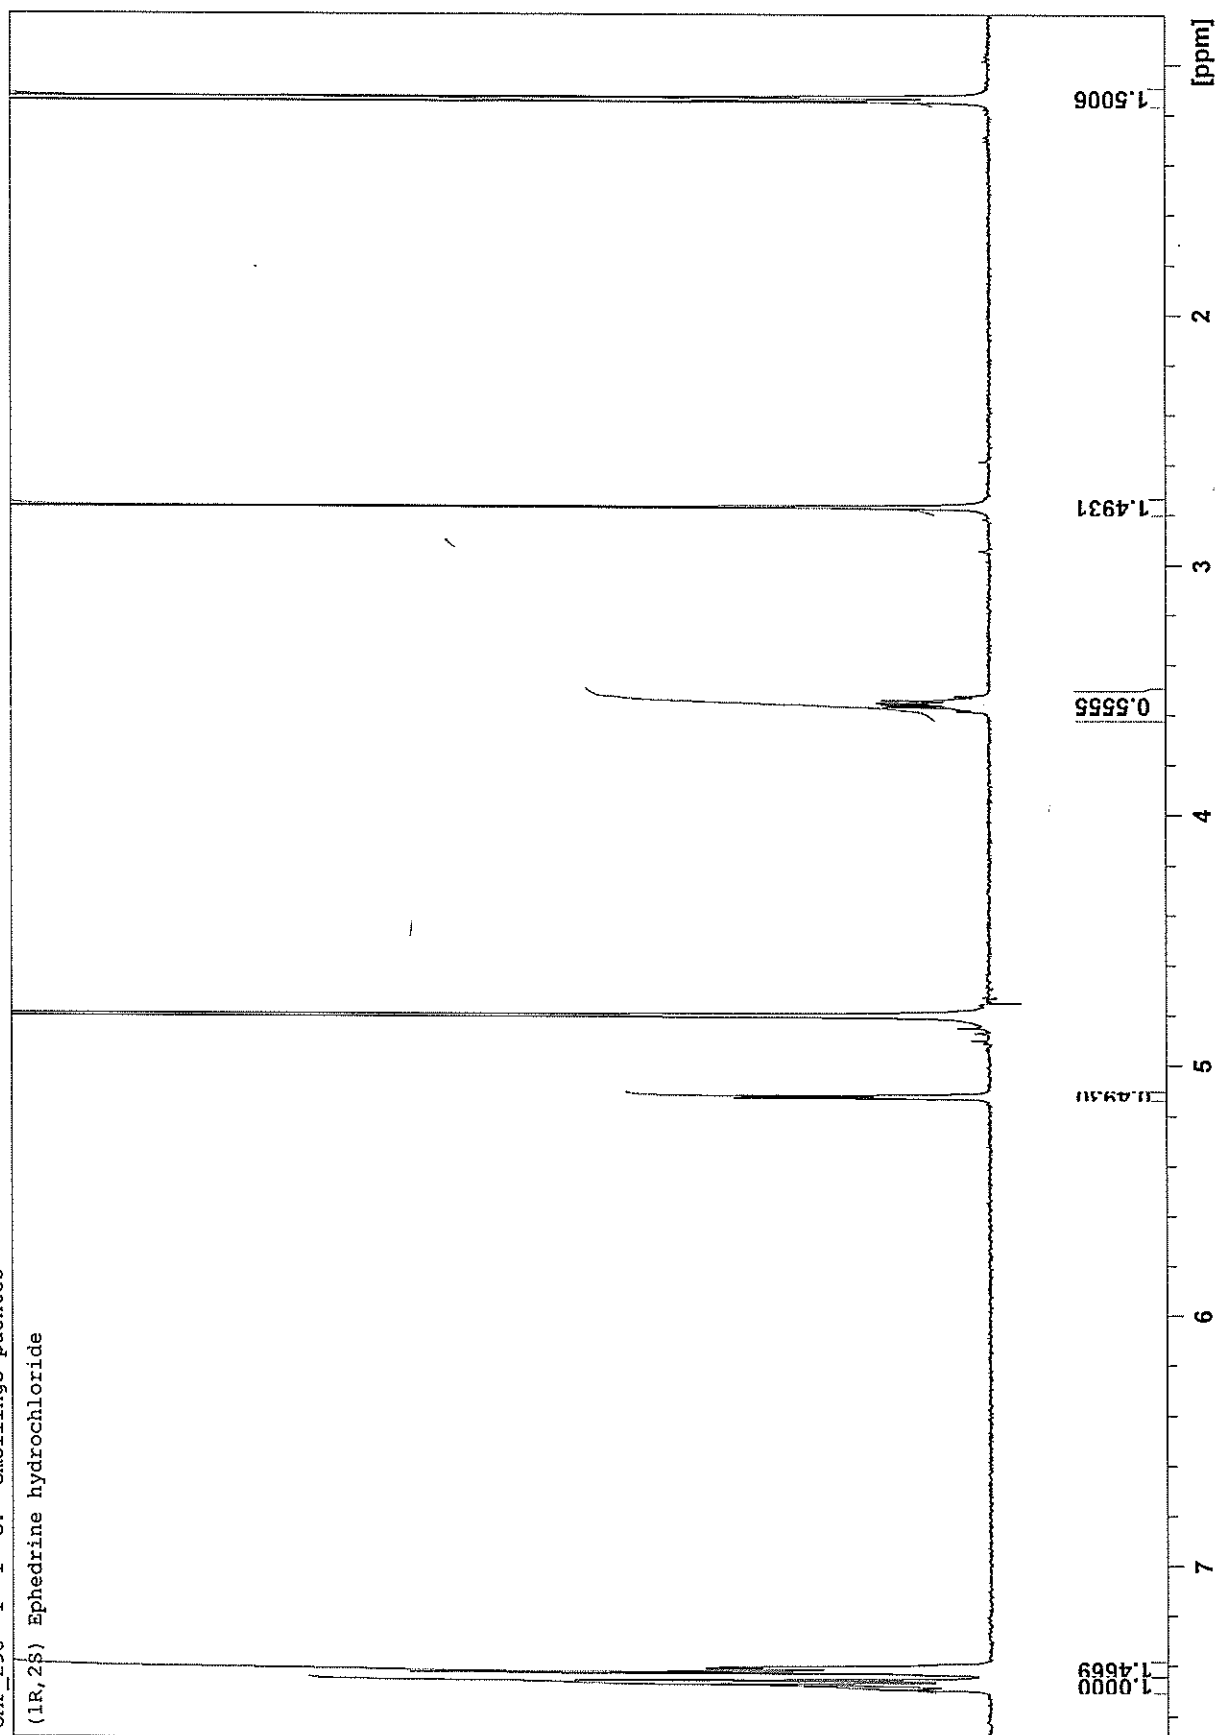

(a)



(b)

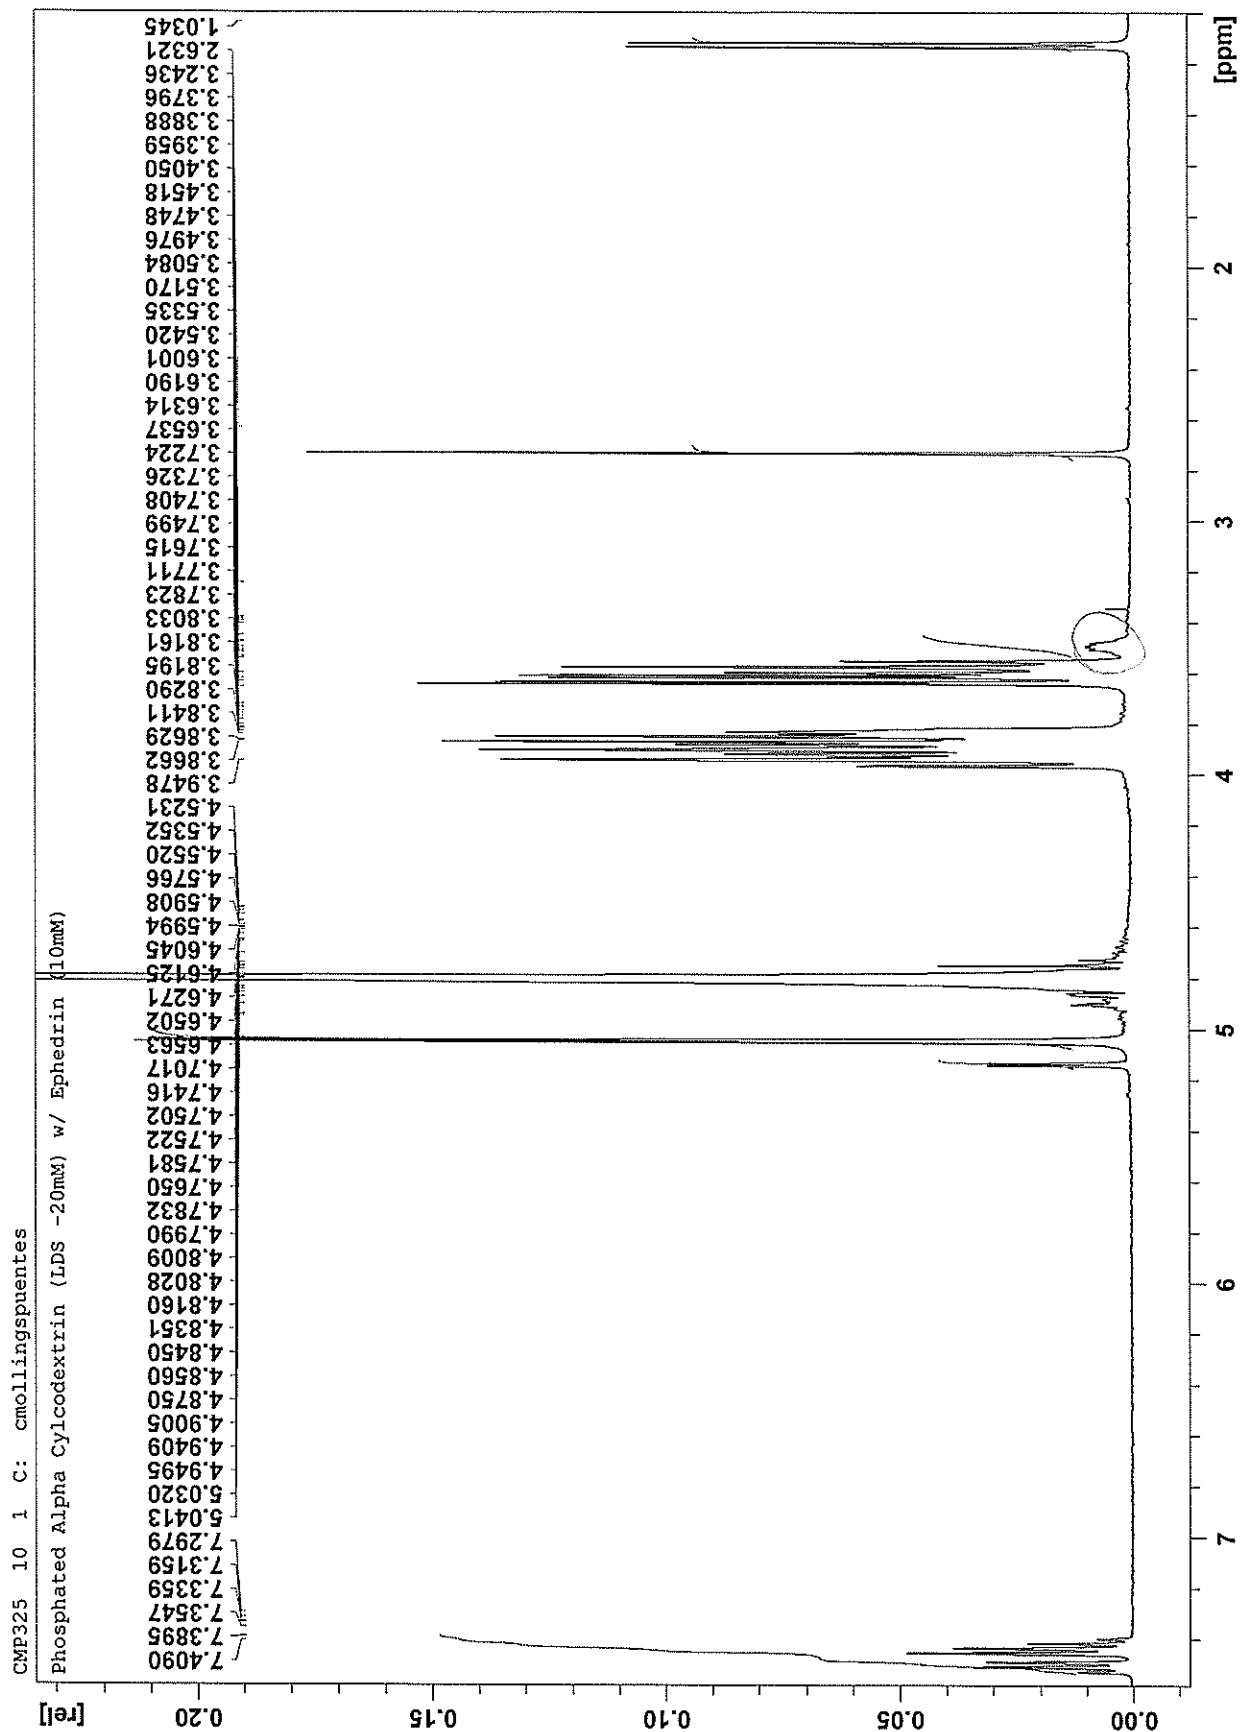

(c)

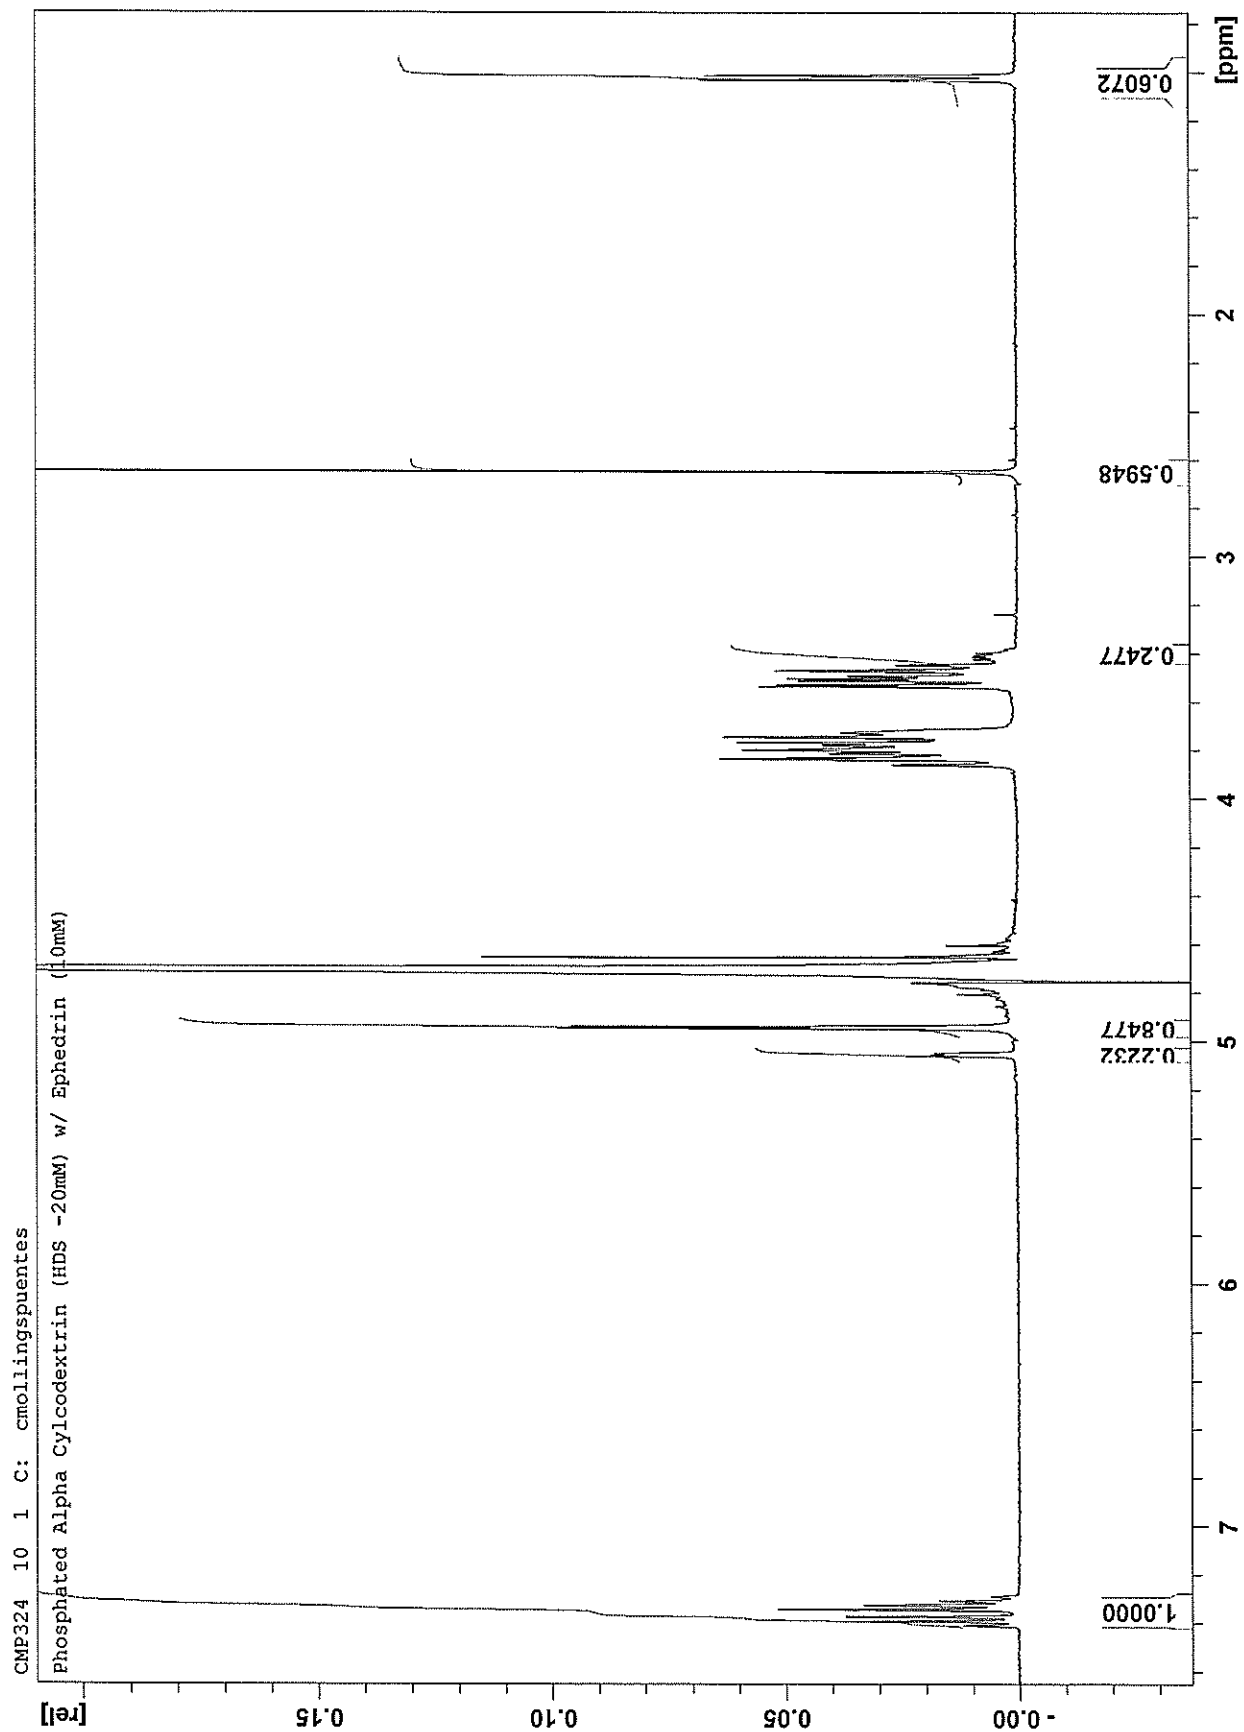

(2)

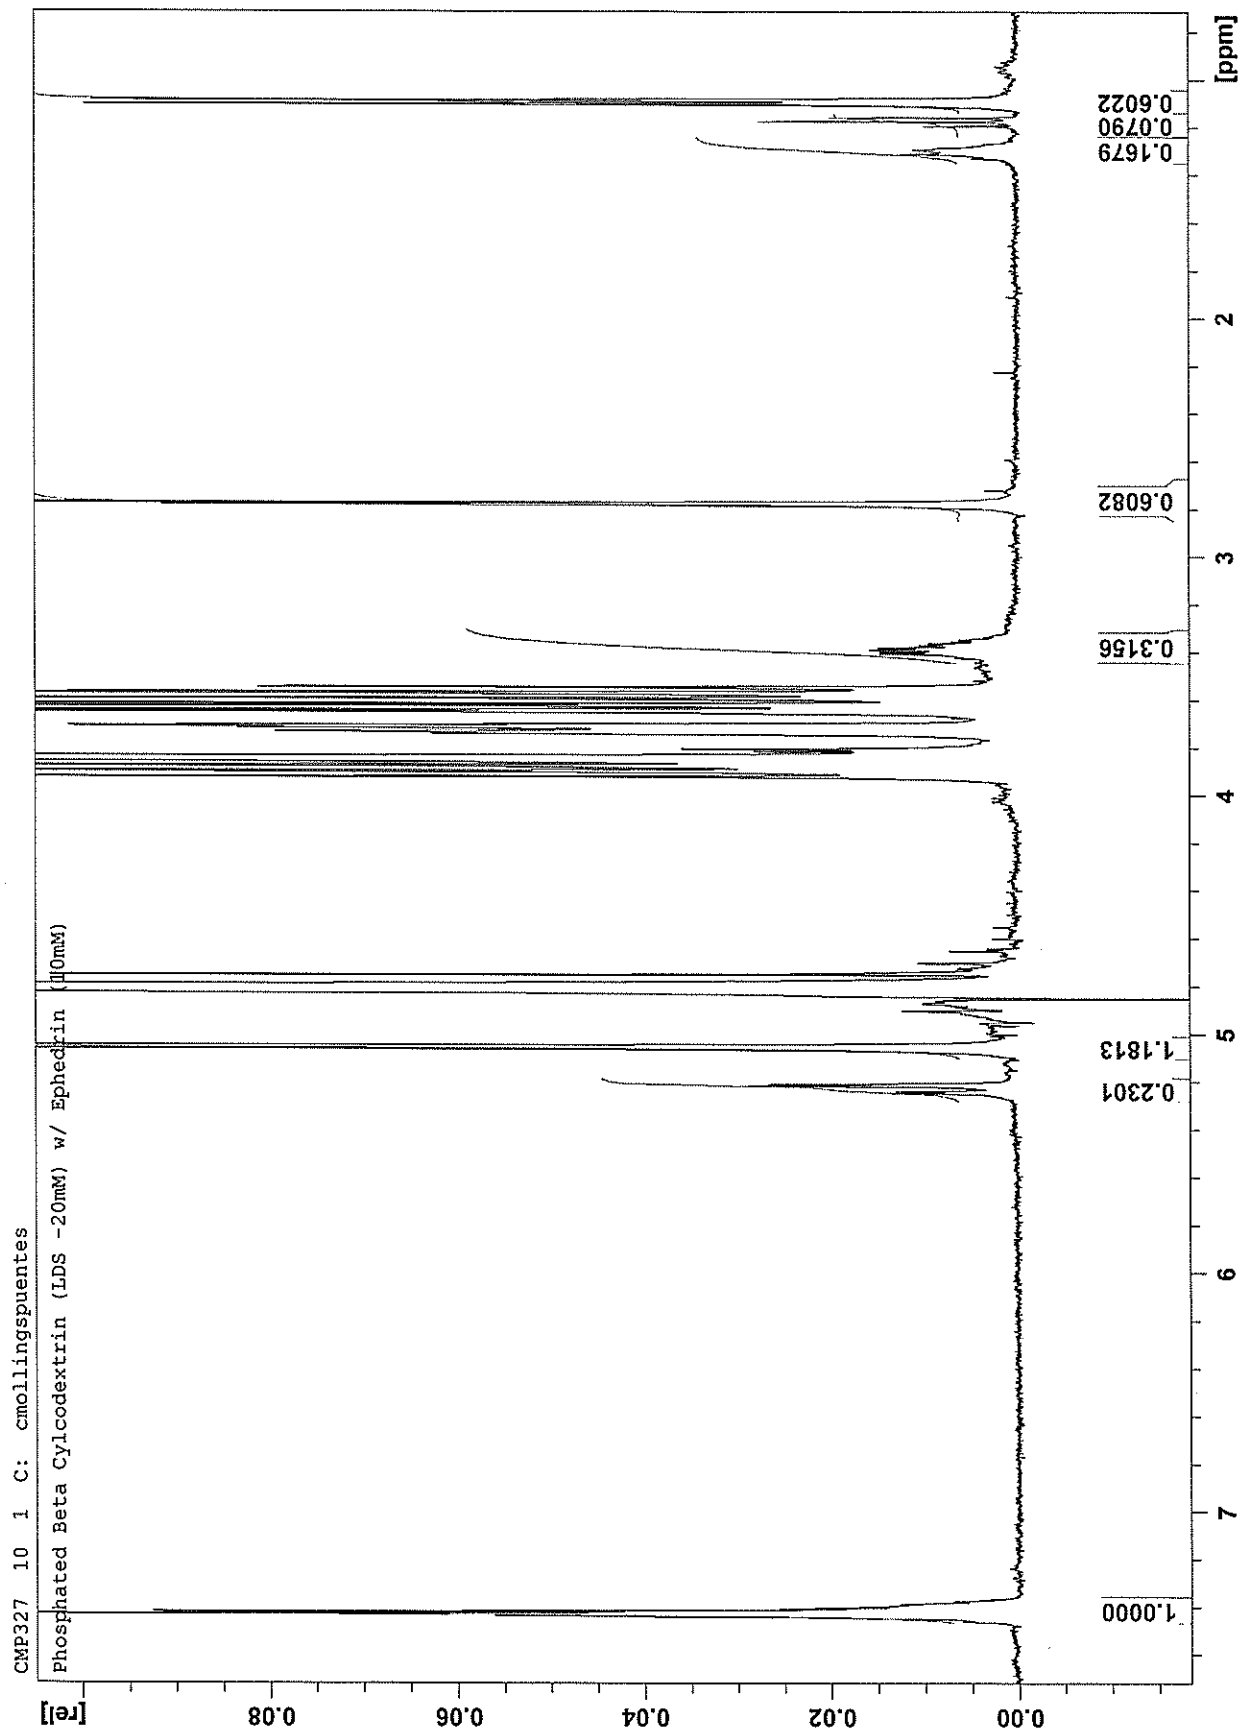

(c)

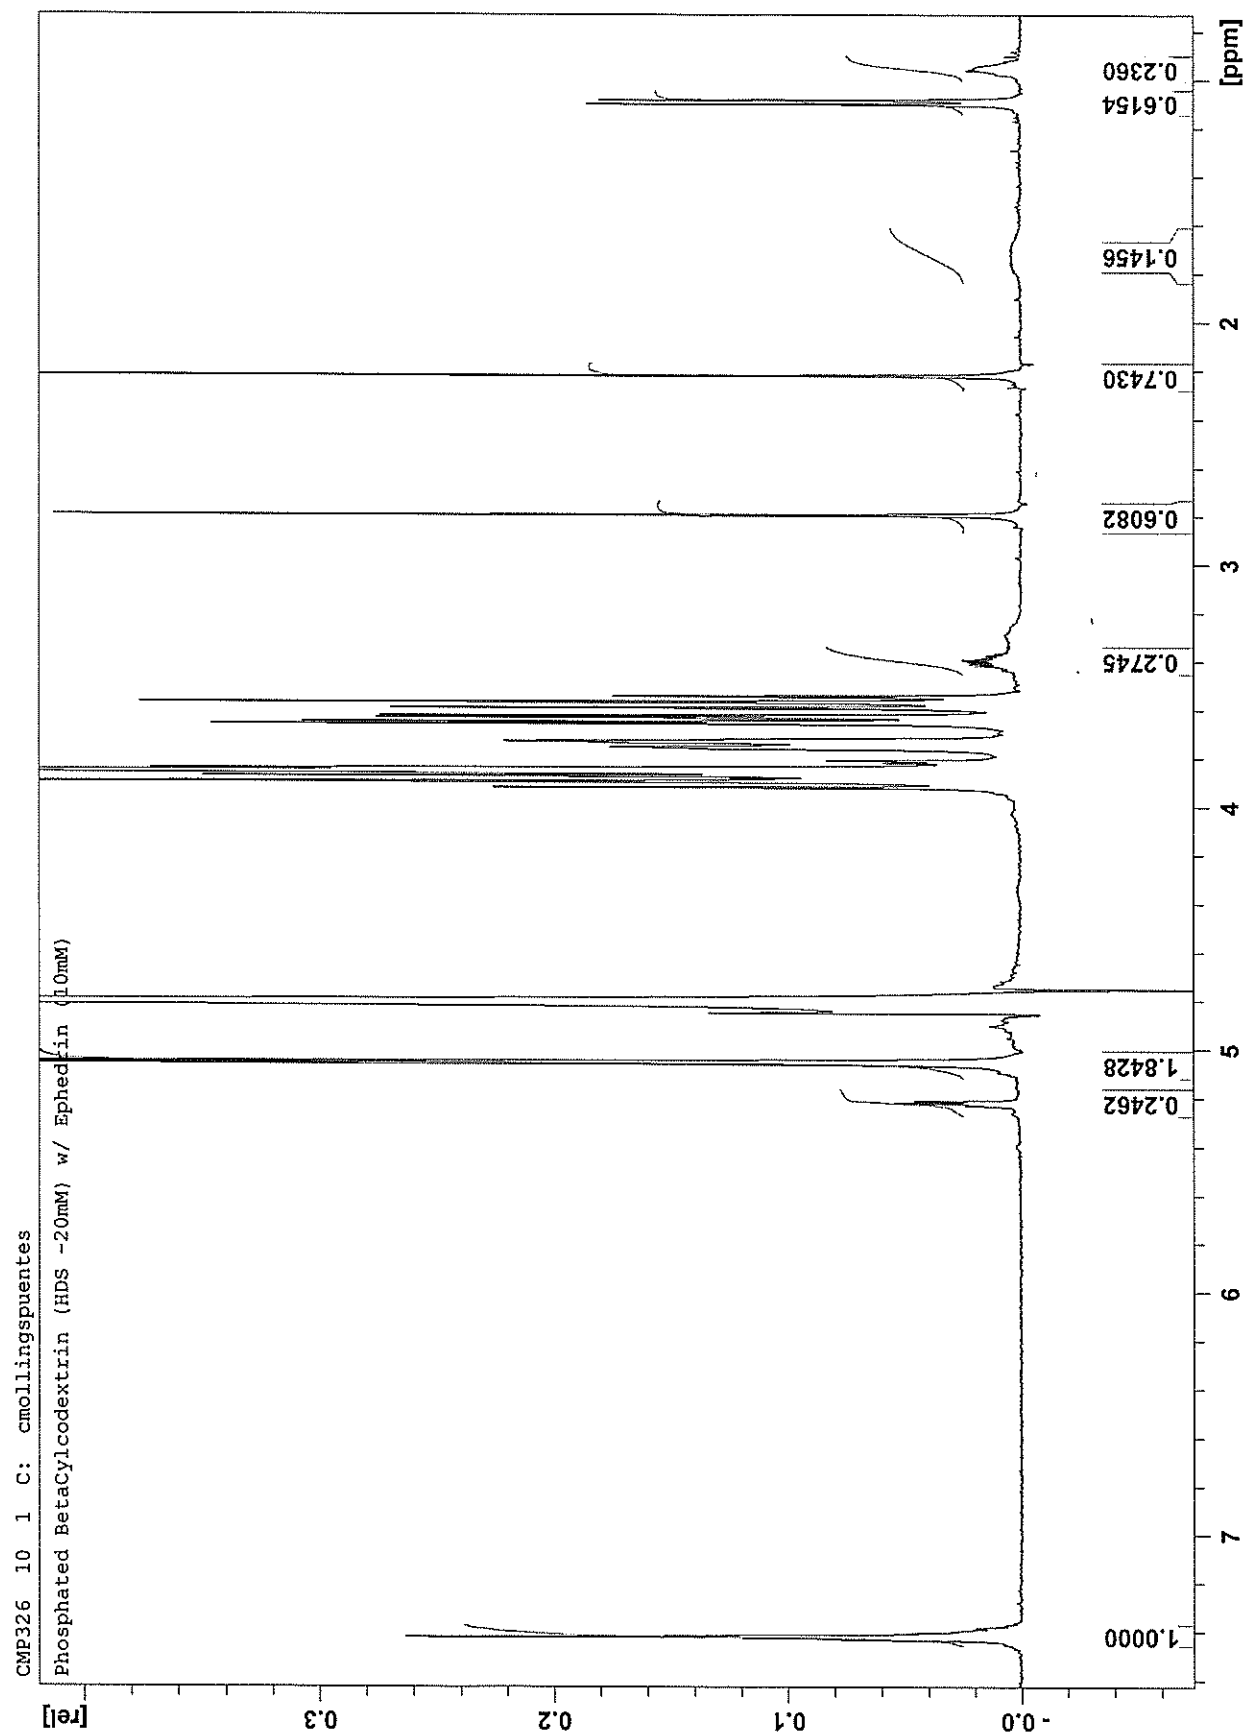

(4)

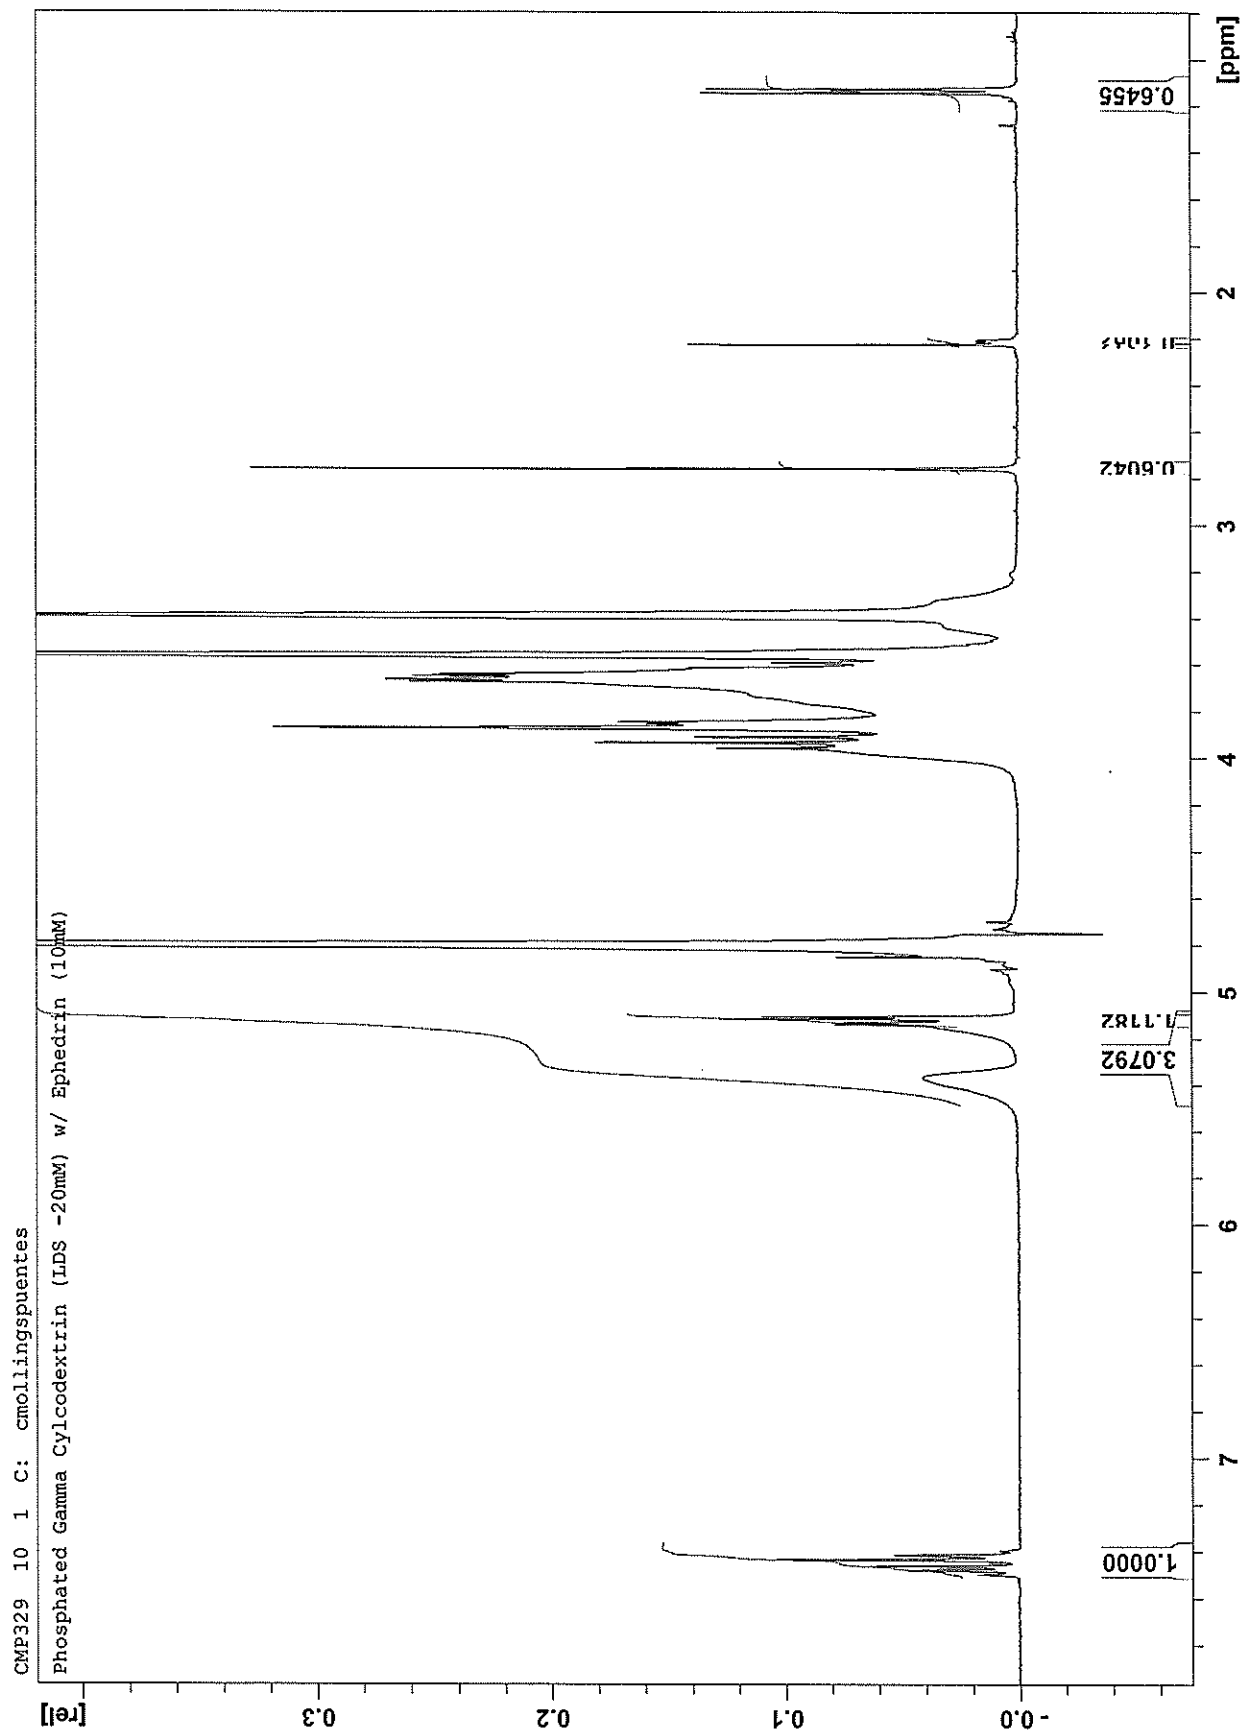

(9)

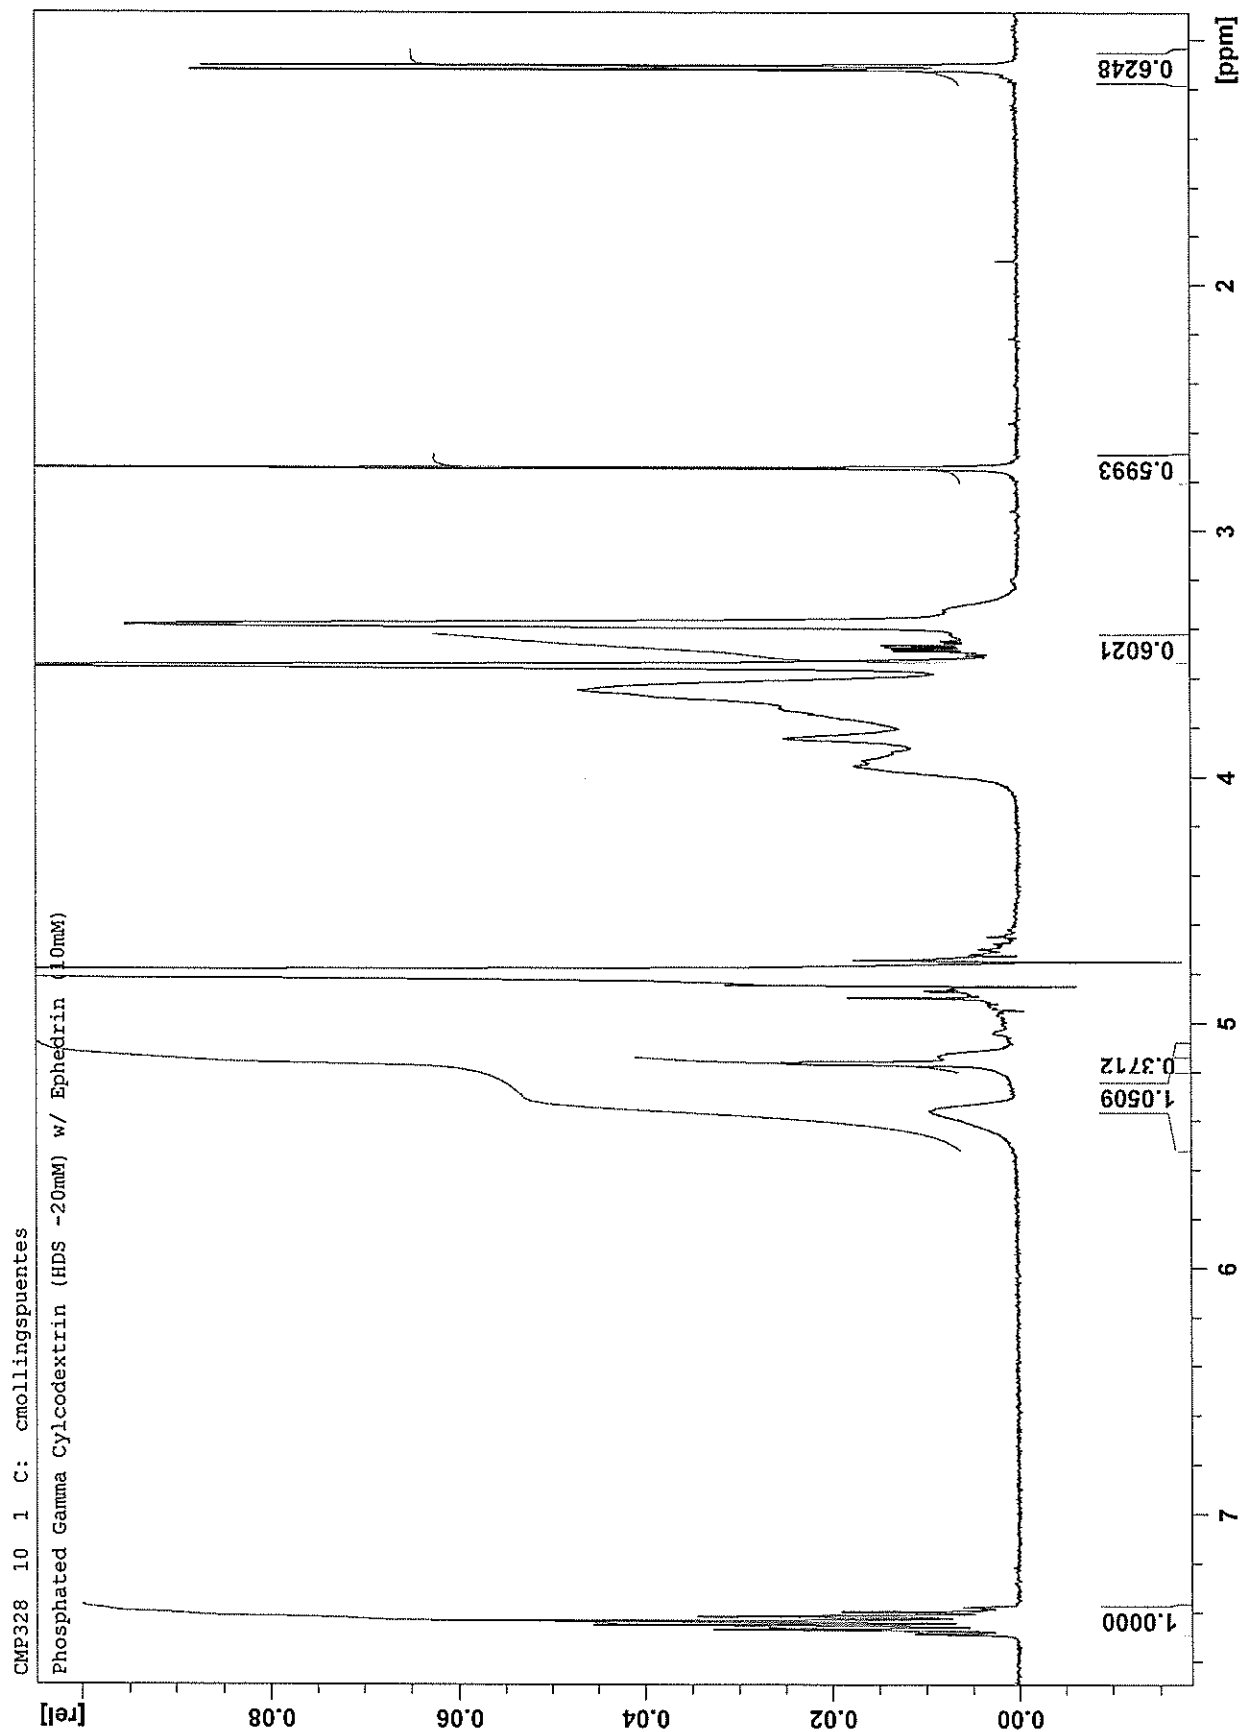

**Figure S3.** Regions of the  $^1\text{H}$  NMR spectrum of **7** (10 mM, enriched in (1*S*2*R*)-enantiomer) with P- $\beta$ -CD-L (20 mM) and increasing concentrations of ytterbium(III)nitrate.

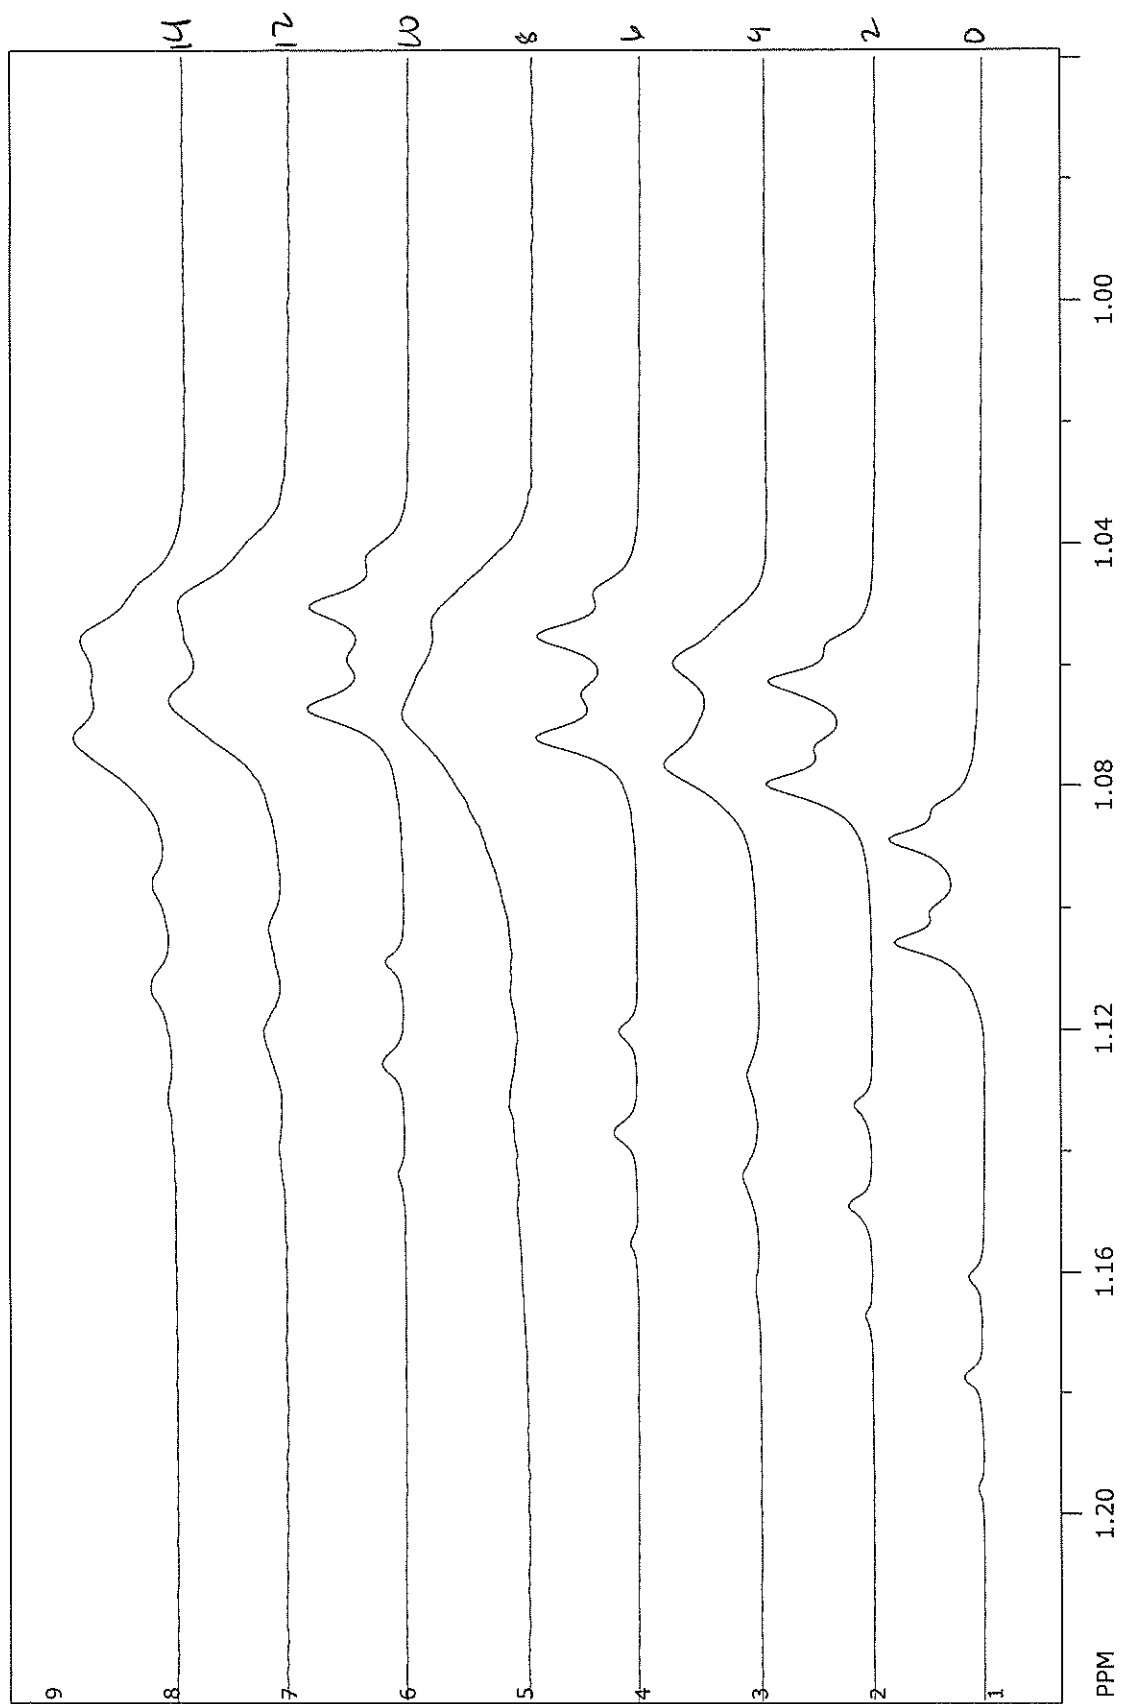

Figure 6 Ephedrine 10mM with 20mM BCD LDS and Yb(NO<sub>3</sub>)<sub>3</sub> (2-20 mM)



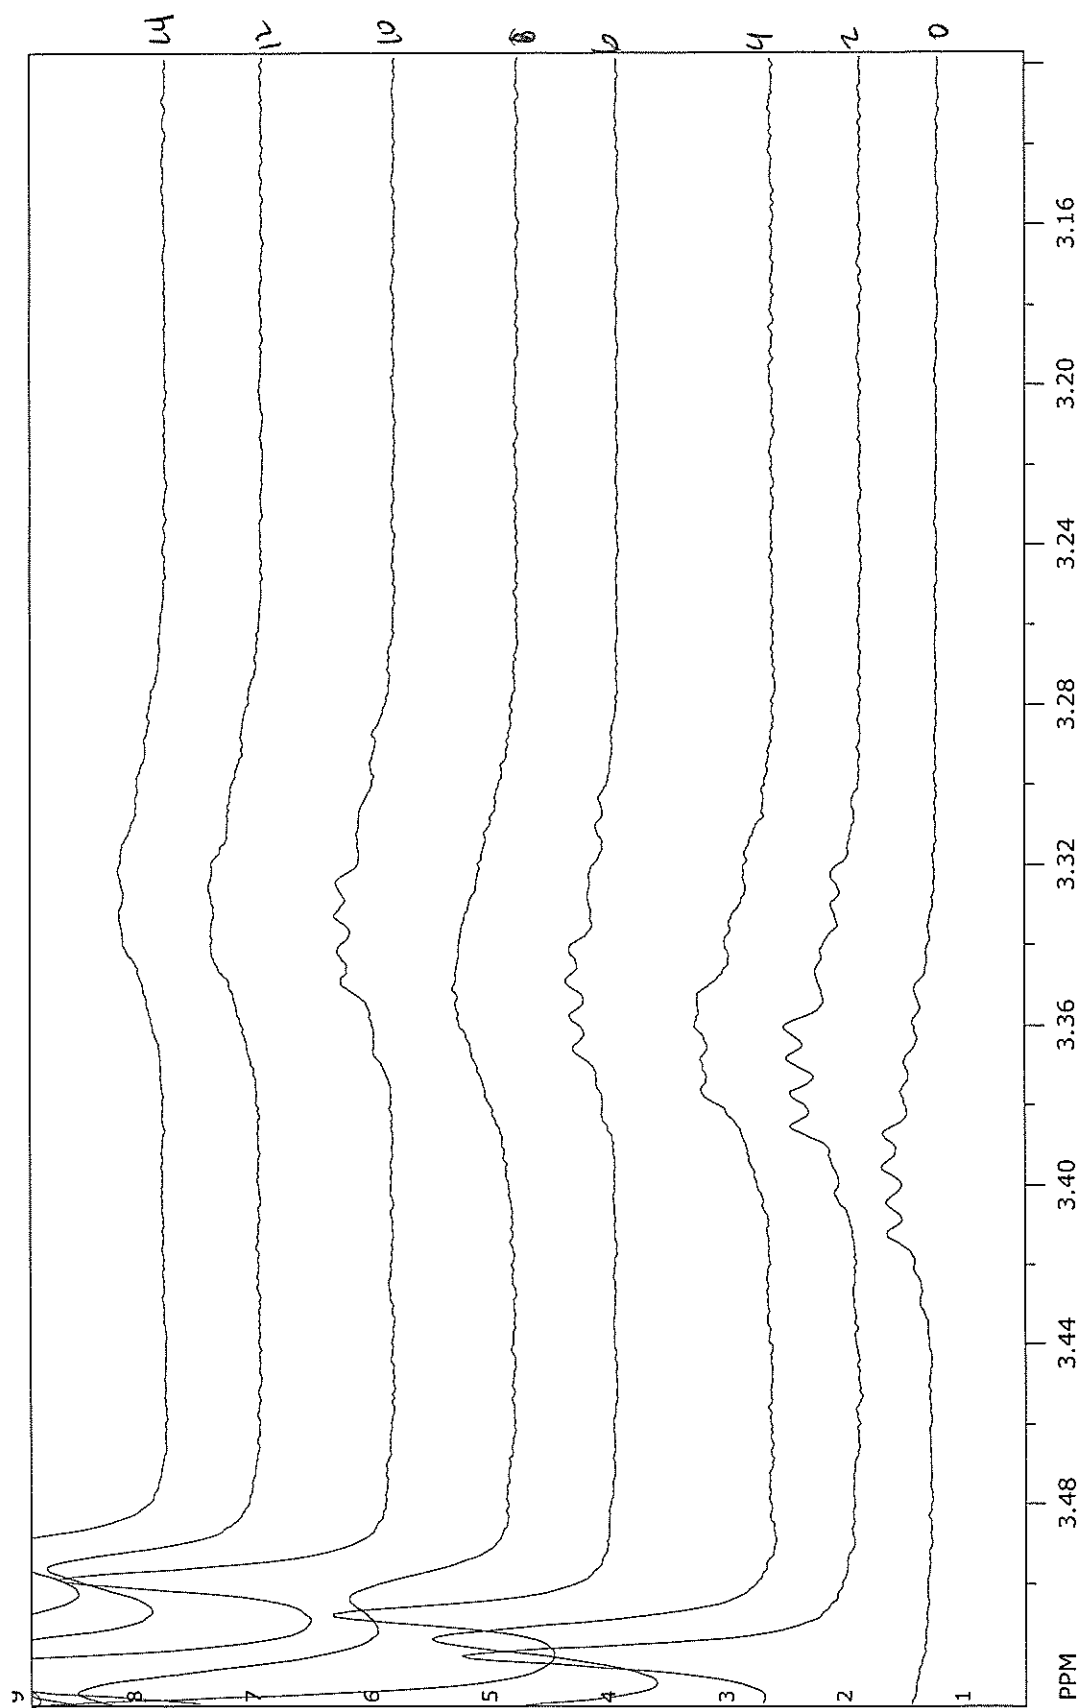

Figure 8 Ephedrine 10mM with 20mM BCD LDS and Yb(NO<sub>3</sub>)<sub>3</sub> (2-20 mM)

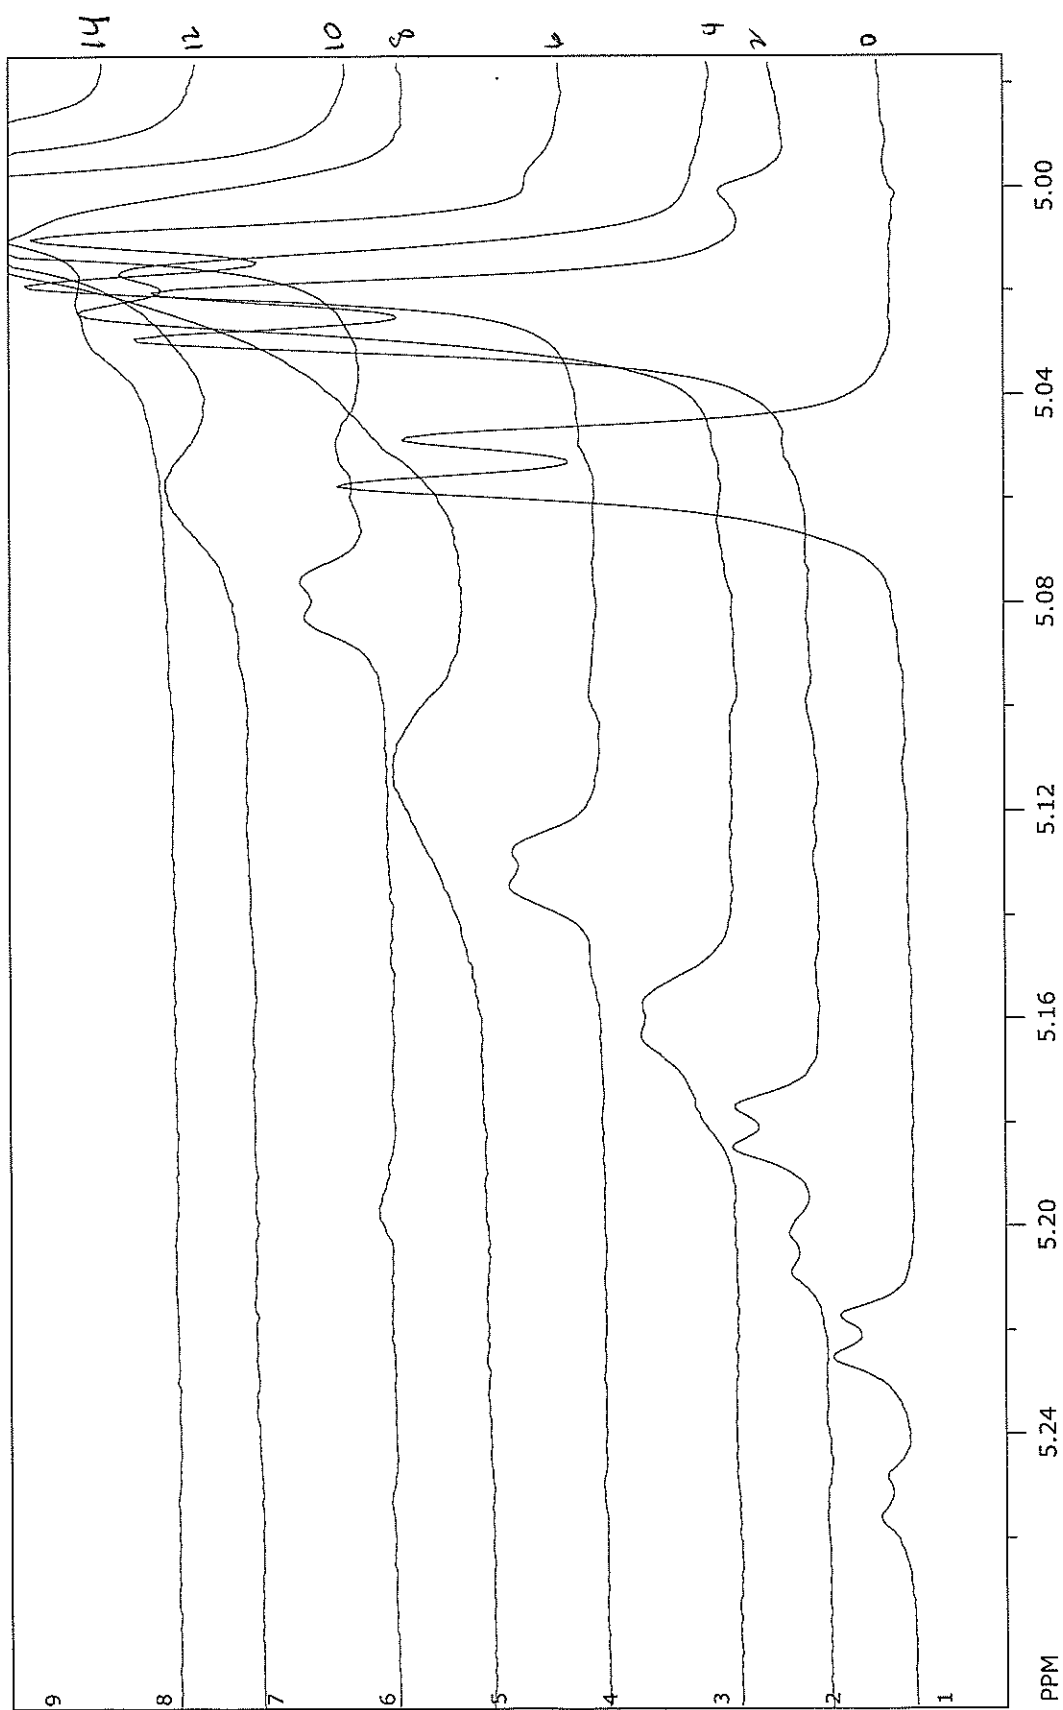

Figure 7 Ephedrine 10mM with 20mM BCD LDS and Yb(NO<sub>3</sub>)<sub>3</sub> (2-20 mM)
